# Supplementary material for: Food wastewater treatment using a hybrid biofilm reactor: nutrient removal performance and functional microorganisms on filler biofilm and suspended sludge
Source: Royal Society of Chemistry journal article supplement (doi:10.1039/d4ra01631a), 2024-01-01
Supplement: d4ra01631a1.pdf [file d4ra01631a1.pdf]

## Supplementary Information

### **Food wastewater treatment by hybrid biofilm reactor: Nutrients removal performance and functional microorganisms on filler biofilm and suspended sludge**

Zhenjun Tian <sup>a, b</sup>, Ying Xiong <sup>c</sup>, Guowen Li <sup>b</sup>, Xiaoxin Cao <sup>d</sup>, Xin Li <sup>d</sup>, Caili Du <sup>b</sup>,  
Liyu Zhang <sup>a, b, \*</sup>

<sup>a</sup> College of Water Sciences, Beijing Normal University, Beijing 100875, China

<sup>b</sup> State Key Laboratory of Environmental Criteria and Risk Assessment, Chinese Research Academy of Environmental Sciences, Beijing 100012, China

<sup>c</sup> Beijing Water Science and Technology Institute, Beijing 100048, China

<sup>d</sup> China Water Environment Group Co. Ltd., Beijing 101101, China

\* Corresponding author: Liyu Zhang (L.Y. Zhang)

E-mail: zhangliyu@163.com; Tel: +010-84918164.

Submitted to *RSC Advances*

As an original research paper

## Contents

**Methods S1** The determination of biofilm mass.

**Fig. S1** Filler biofilm status at different experimental stages.

**Fig. S2** Denitrification activity of fillers and sludge in column A (a), and column O (b); Nitrification activity of fillers and sludge in column O (c), and oxygen consumption rate curve of fillers and sludge in column O (d).

**Fig. S3** Operation status of the column O: (a) COD load and HRT at different experimental stages, and (b) temporal trends in DO and temperature; nutrient-removal profiles of (c) COD, (d)  $\text{NH}_4^+\text{-N}$ , (e)  $\text{NO}_3^-\text{-N}$  and  $\text{NO}_2^-\text{-N}$ , and (f) TP.

**Fig. S4** (a) The flowchart of the UASB+HBR process, and (b) the envisioned performance of the UASB+HBR process for treating FWW.

**Table S1** The characteristics of the FWW (mg/L).

**Table S2** Alpha diversity of total bacterial 16S rRNA gene in the HBR system.

**Table S3** Carbohydrate metabolism pathways and the abundance of metabolism genes in HBR system.

**Table S4** Abundance of nitrogen metabolism genes in HBR system.

**Table S5** The network analysis topology features between different groups.

**Table S6** Comparison of COD removal in FWW between HBR and other biological treatment processes.

**Table S7** Contribution of column A and column O to COD removal in stage I.

**Table S8** Performance of UASB process in degrading organic wastewater.

**Table S9** Permissible organic volume loading rate of different wastewater at different temperatures.

**Methods S1** The determination of biofilm mass.

Take 30 fillers from the column and dry them in a 105°C oven for more than 5 hours. After the fillers have cooled to room temperature, weigh them and record them as  $W_1$ . Then, place the filler in a 1 mol/L 70°C NaOH solution and continuously stir for 1 hour. The hot alkaline solution can break the adhesive between the microorganisms on the biofilm and the filler carrier. After removing the filler, rinse it thoroughly and place it in an ultrasonic cracking tank for 30 minutes (40Hz). The stripped clean filler is then placed in a 105°C oven and dried for 5 hours. After cooling to room temperature, it is weighed and recorded as  $W_2$ . The amount of biofilm ( $m$ ) on the filler can be calculated by:

$$m = \frac{M_1 - M_2}{M_2} \times 10^3 \quad (\text{mg/g})$$

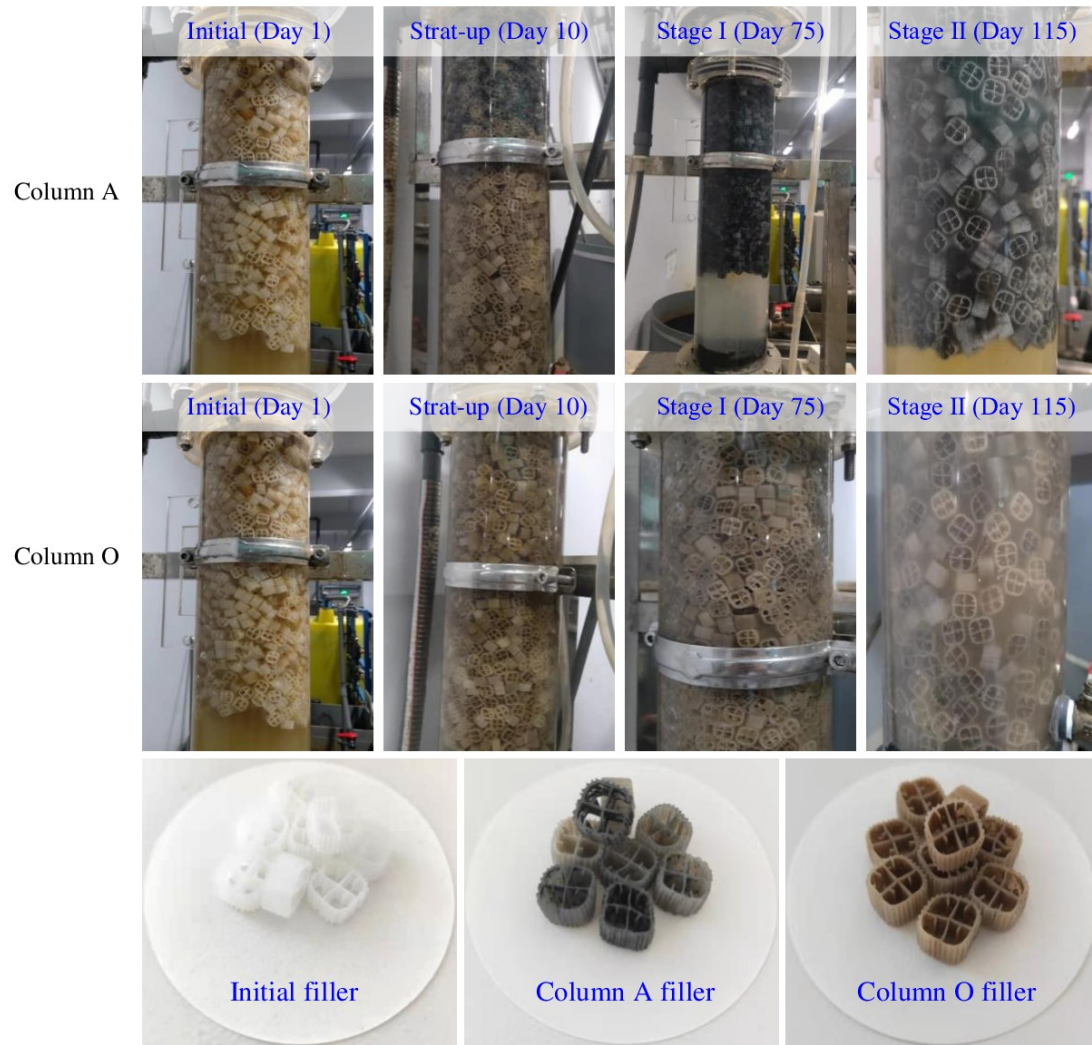

**Fig. S1** Filler biofilm status at different experimental stages.

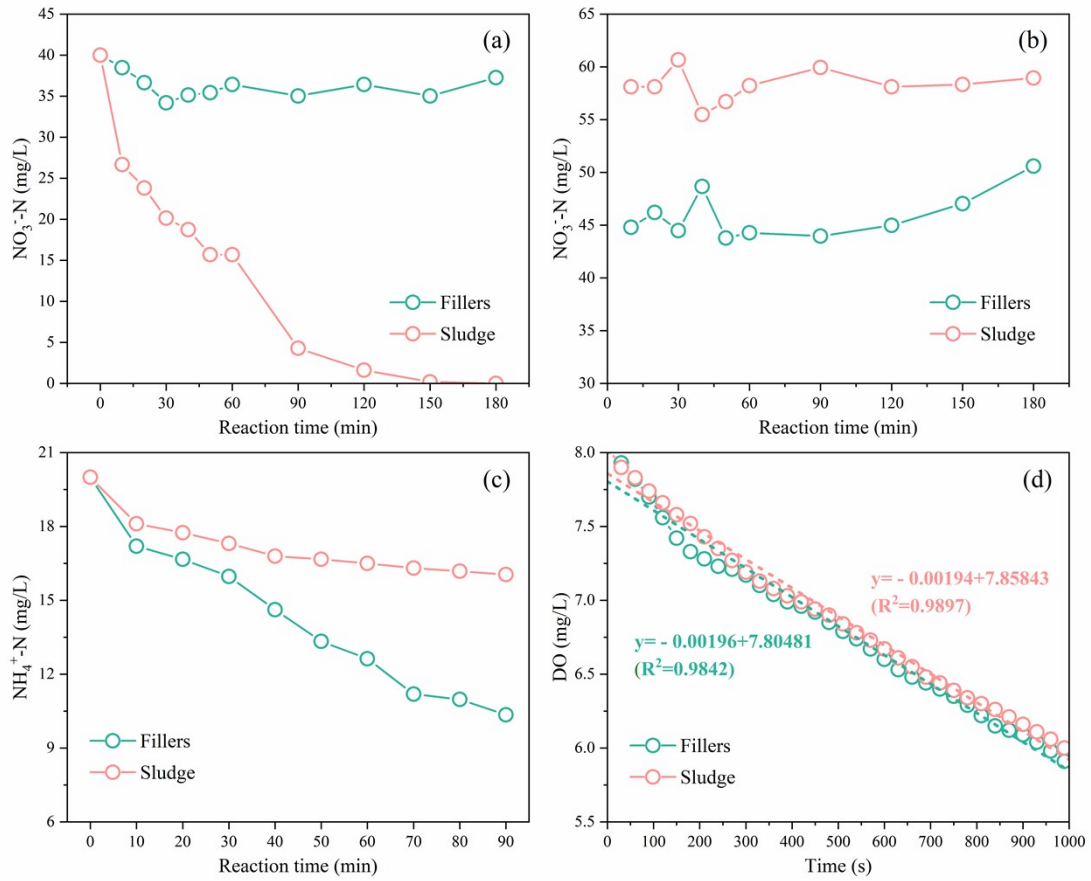

**Fig. S2** (a) Denitrification activity of fillers and sludge in column A (a), and column O (b); Nitrification activity of fillers and sludge in column O (c), and oxygen consumption rate curve of fillers and sludge in column O (d).

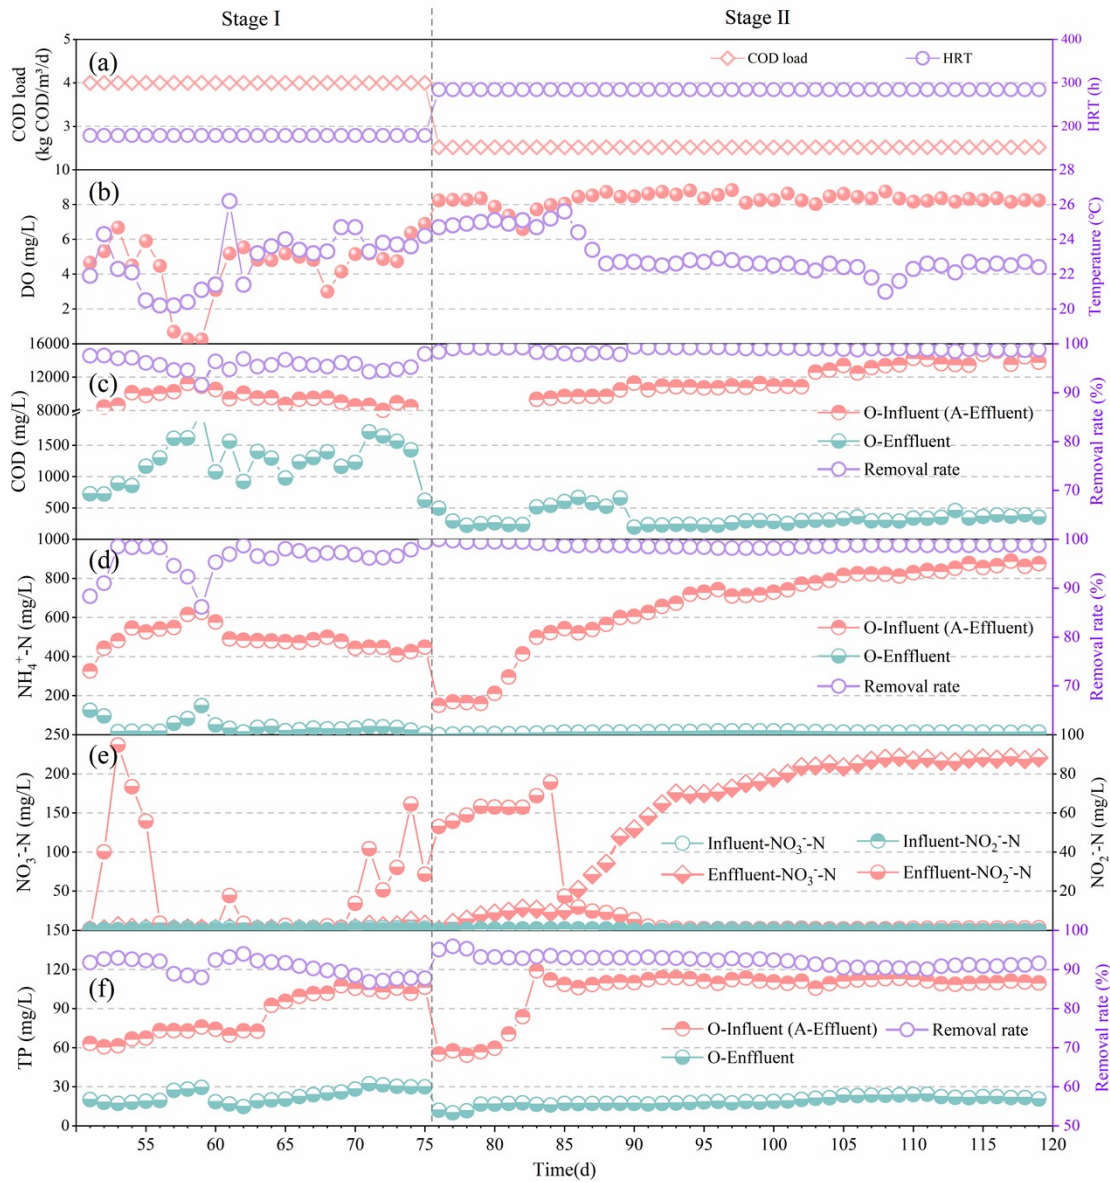

**Fig. S3** Operation status of the column O: (a) COD load and HRT at different experimental stages, and (b) temporal trends in DO and temperature; nutrient-removal profiles of (c) COD, (d)  $\text{NH}_4^+\text{-N}$ , (e)  $\text{NO}_3^-\text{-N}$  and  $\text{NO}_2^-\text{-N}$ , and (f) TP.

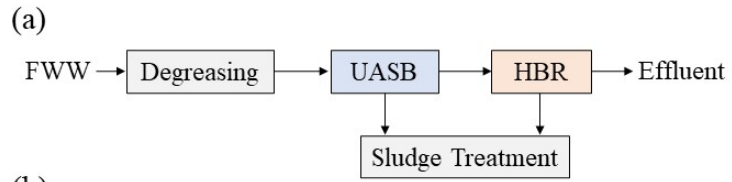

(b)

| Unit | Designed influent<br>COD concentration<br>(mg/L) | Designed effluent<br>COD concentration<br>(mg/L) | COD removal<br>rate (%) | HRT (h)       |
|------|--------------------------------------------------|--------------------------------------------------|-------------------------|---------------|
| UASB | 30000                                            | 4500                                             | 85%                     | 61.2          |
| HBR  | 4500                                             | < 500                                            | 97%                     | 57.14         |
|      |                                                  |                                                  | Total                   | <b>118.34</b> |

**Fig. S4** (a) The flowchart of the UASB-HBR process, and (b) the envisioned performance of the UASB+HBR process for treating FWW.

**Table S1** The characteristics of the FWW (mg/L).

|                    | Chemical oxygen demand (COD) | Ammonia nitrogen (NH <sub>4</sub> <sup>+</sup> -N) | Total nitrogen (TN) | Total phosphorus (TP) |
|--------------------|------------------------------|----------------------------------------------------|---------------------|-----------------------|
| FWW                | 29860 ± 276                  | 1072.3 ± 14.6                                      | 1245.7 ± 134.7      | 245.1 ± 15.3          |
| Effluent standards | 500                          | /                                                  | /                   | /                     |

/ indicates that there is no limit on the effluent concentration of this parameter.



**Table S2** Alpha diversity of total bacterial 16S rRNA gene in the HBR system.

| Sample   | ace     | chao    | coverage | shannon | simpson | sobs |
|----------|---------|---------|----------|---------|---------|------|
| F-A-P1-1 | 1258.45 | 1204.18 | 0.9921   | 4.7824  | 0.03150 | 1031 |
| F-A-P1-2 | 1296.39 | 1266.96 | 0.9915   | 4.7791  | 0.0323  | 1043 |
| F-A-P1-3 | 1275.64 | 1210.78 | 0.9919   | 4.7314  | 0.0350  | 1034 |
| S-A-P1-1 | 1292.99 | 1222.60 | 0.9912   | 4.6272  | 0.0279  | 1027 |
| S-A-P1-2 | 1304.38 | 1263.10 | 0.9908   | 4.4811  | 0.0329  | 1003 |
| S-A-P1-3 | 1239.46 | 1170.54 | 0.9917   | 4.5200  | 0.0314  | 988  |
| F-O-P1-1 | 1273.13 | 1251.72 | 0.9915   | 4.6601  | 0.0353  | 1015 |
| F-O-P1-2 | 1248.40 | 1212.40 | 0.9916   | 4.6326  | 0.0352  | 984  |
| F-O-P1-3 | 1232.04 | 1176.88 | 0.9923   | 4.6037  | 0.0380  | 1027 |
| S-O-P1-1 | 1059.02 | 1020.78 | 0.9924   | 4.3212  | 0.0332  | 818  |
| S-O-P1-2 | 1106.82 | 1099.16 | 0.9917   | 4.2499  | 0.0369  | 826  |
| S-O-P1-3 | 1042.41 | 1004.57 | 0.9925   | 4.2602  | 0.0362  | 795  |
| F-A-P2-1 | 1397.46 | 1378.04 | 0.9913   | 5.3907  | 0.0105  | 1143 |
| F-A-P2-2 | 1391.91 | 1392.73 | 0.9913   | 5.3741  | 0.0112  | 1156 |
| F-A-P2-3 | 1501.06 | 1448.06 | 0.9905   | 5.4242  | 0.0103  | 1230 |
| S-A-P2-1 | 1427.55 | 1381.97 | 0.9896   | 4.6741  | 0.0284  | 1066 |
| S-A-P2-2 | 1329.92 | 1270.23 | 0.9908   | 4.6543  | 0.0303  | 1038 |
| S-A-P2-3 | 1382.59 | 1377.50 | 0.9897   | 4.6136  | 0.0313  | 1018 |
| F-O-P2-1 | 1152.67 | 1133.62 | 0.9930   | 4.7146  | 0.0282  | 966  |
| F-O-P2-2 | 1225.84 | 1188.61 | 0.9923   | 4.7523  | 0.0274  | 1015 |
| F-O-P2-3 | 1177.82 | 1143.89 | 0.99263  | 4.6969  | 0.0285  | 968  |
| S-O-P2-1 | 1108.70 | 1041.41 | 0.9922   | 4.1376  | 0.0595  | 859  |
| S-O-P2-2 | 1101.54 | 1032.87 | 0.9924   | 4.1427  | 0.0558  | 864  |
| S-O-P2-3 | 1106.54 | 1077.58 | 0.9920   | 4.1607  | 0.0533  | 834  |

**Table S3** Carbohydrate metabolism pathways and the abundance of metabolism genes in HBR system.

| Metabolic pathways              | Pathway modules | Metabolism                                               | F-A-P1    | S-A-P1    | F-O-P1    | S-O-P1    | F-A-P2    | S-A-P2    | F-O-P2    | S-O-P2    |
|---------------------------------|-----------------|----------------------------------------------------------|-----------|-----------|-----------|-----------|-----------|-----------|-----------|-----------|
| Glycolysis /<br>Gluconeogenesis | M00001          | Glycolysis (Embden-Meyerhof pathway)                     | 349538.88 | 377707.42 | 389636.68 | 373014.56 | 375335.80 | 363486.95 | 386219.73 | 381399.29 |
|                                 | M00002          | Glycolysis, core module involving three-carbon compounds | 218688.38 | 228672.85 | 248098.27 | 225851.20 | 229019.36 | 223835.29 | 244402.67 | 236925.59 |
|                                 | M00003          | Gluconeogenesis                                          | 262729.46 | 284966.51 | 299057.73 | 283084.10 | 283364.67 | 269552.88 | 291470.87 | 290725.26 |
|                                 | M00307          | Pyruvate oxidation                                       | 135156.93 | 201707.03 | 179433.83 | 186414.51 | 143693.26 | 198479.40 | 189168.63 | 202933.44 |
| Citrate cycle<br>(TCA cycle)    | M00003          | Gluconeogenesis                                          | 262729.46 | 284966.51 | 299057.73 | 283084.10 | 283364.67 | 269552.88 | 291470.87 | 290725.26 |
|                                 | M00307          | Pyruvate oxidation                                       | 135156.93 | 201707.03 | 179433.83 | 186414.51 | 143693.26 | 198479.40 | 189168.63 | 202933.44 |
|                                 | M00009          | Citrate cycle (TCA cycle, Krebs cycle)                   | 393191.55 | 509322.09 | 532551.55 | 507395.63 | 403844.84 | 498792.99 | 511538.19 | 475843.50 |
|                                 | M00010          | Citrate cycle, first carbon oxidation                    | 75134.57  | 95968.20  | 120521.87 | 96092.18  | 79297.93  | 89876.86  | 112150.11 | 89297.06  |
|                                 | M00011          | Citrate cycle, second carbon oxidation                   | 318056.98 | 413353.90 | 412029.68 | 411303.45 | 324546.91 | 408916.13 | 399388.08 | 386546.44 |
|                                 | M00740          | Methylaspartate cycle                                    | 89544.56  | 141280.67 | 161559.36 | 143453.10 | 99123.77  | 121620.90 | 153598.71 | 127597.22 |
| Pentose phosphate pathway       | M00004          | Pentose phosphate pathway (Pentose phosphate cycle)      | 186192.39 | 242576.59 | 242268.15 | 255248.69 | 203432.99 | 226972.66 | 235845.29 | 251905.83 |
|                                 | M00006          | Pentose phosphate pathway, oxidative phase               | 28176.57  | 56742.93  | 74497.05  | 65869.41  | 34020.25  | 49343.03  | 70459.75  | 73368.27  |
|                                 | M00007          | Pentose phosphate pathway, non-oxidative phase           | 131359.22 | 152237.95 | 139478.01 | 155147.15 | 140882.31 | 145248.99 | 136732.12 | 142908.71 |
|                                 | M00005          | PRPP biosynthesis                                        | 31398.28  | 40126.08  | 31689.46  | 37858.84  | 29836.04  | 41338.16  | 32106.04  | 41165.35  |
|                                 | M00008          | Entner-Doudoroff pathway                                 | 33709.20  | 65040.97  | 74225.54  | 76029.25  | 41403.14  | 55875.71  | 67295.49  | 77863.08  |
|                                 | M00308          | Semi-phosphorylative Entner-Doudoroff pathway            | 91853.47  | 110784.45 | 96892.40  | 113585.64 | 94673.25  | 103823.03 | 92181.08  | 115808.15 |
|                                 | M00633          | Semi-phosphorylative Entner-Doudoroff pathway            | 391.27    | 3361.66   | 2333.73   | 3624.82   | 1040.78   | 3629.25   | 2890.11   | 5943.21   |
|                                 | M00309          | Non-phosphorylative Entner-                              | 9524.74   | 8060.90   | 3280.38   | 3888.60   | 19361.04  | 8921.48   | 5557.54   | 3744.82   |

|                                             |        |                                                      |           |           |           |           |           |           |           |           |
|---------------------------------------------|--------|------------------------------------------------------|-----------|-----------|-----------|-----------|-----------|-----------|-----------|-----------|
|                                             |        | Doudoroff pathway                                    |           |           |           |           |           |           |           |           |
| Pentose and glucuronate interconversions    | M00014 | Glucuronate pathway (uronate pathway)                | 49078.00  | 54133.68  | 55801.94  | 54858.36  | 60824.80  | 51922.07  | 66466.53  | 51740.53  |
|                                             | M00631 | D-Galacturonate degradation (bacteria)               | 38295.74  | 59954.54  | 42267.09  | 62786.50  | 40085.07  | 54705.94  | 38013.16  | 67628.84  |
|                                             | M00061 | D-Glucuronate degradation                            | 38681.70  | 54840.98  | 46740.44  | 59467.77  | 42657.54  | 52655.59  | 42247.90  | 64800.00  |
|                                             | M00081 | Pectin degradation                                   | 301.06    | 7045.05   | 548.89    | 7627.00   | 235.48    | 7472.07   | 777.20    | 12197.32  |
| Galactose metabolism                        | M00633 | Semi-phosphorylative Entner-Doudoroff pathway        | 391.27    | 3361.66   | 2333.73   | 3624.82   | 1040.78   | 3629.25   | 2890.11   | 5943.21   |
|                                             | M00309 | Non-phosphorylative Entner-Doudoroff pathway         | 9524.74   | 8060.90   | 3280.38   | 3888.60   | 19361.04  | 8921.48   | 5557.54   | 3744.82   |
|                                             | M00632 | Galactose degradation, Leloir pathway                | 71011.32  | 90050.25  | 94366.66  | 91429.20  | 75387.16  | 80971.07  | 98611.59  | 104408.32 |
|                                             | M00552 | D-galactonate degradation, De Ley-Doudoroff pathway  | 69820.12  | 84585.74  | 85542.24  | 88333.82  | 71899.38  | 78354.55  | 79803.61  | 84491.81  |
|                                             | M00554 | Nucleotide sugar biosynthesis                        | 12976.49  | 20141.84  | 17226.70  | 17455.59  | 14283.33  | 17465.42  | 20643.27  | 22978.91  |
| Starch and sucrose metabolism               | M00854 | Glycogen biosynthesis                                | 94089.58  | 92750.91  | 101323.62 | 84151.55  | 96857.89  | 92456.44  | 91844.32  | 79766.39  |
|                                             | M00855 | Glycogen degradation                                 | 75946.27  | 74795.46  | 77458.83  | 68210.80  | 78298.89  | 83693.74  | 72957.11  | 70135.53  |
|                                             | M00565 | Trehalose biosynthesis                               | 73518.46  | 73179.98  | 84292.27  | 63303.86  | 77435.30  | 73643.88  | 75302.97  | 61172.66  |
| Amino sugar and nucleotide sugar metabolism | M00549 | Nucleotide sugar biosynthesis                        | 76572.65  | 89317.37  | 100284.57 | 88815.98  | 87501.53  | 84966.79  | 97740.76  | 83322.29  |
|                                             | M00554 | Nucleotide sugar biosynthesis                        | 12976.49  | 20141.84  | 17226.70  | 17455.59  | 14283.33  | 17465.42  | 20643.27  | 22978.91  |
|                                             | M00892 | UDP-N-acetyl-D-glucosamine biosynthesis, eukaryotes  | 82934.50  | 101926.15 | 101375.89 | 103223.11 | 92113.35  | 95639.30  | 102270.88 | 95906.89  |
|                                             | M00909 | UDP-N-acetyl-D-glucosamine biosynthesis, prokaryotes | 127319.44 | 142802.78 | 153744.15 | 143345.26 | 143608.92 | 137756.76 | 155349.69 | 139742.74 |
|                                             | M00761 | Undecaprenylphosphate alpha-L-Ara4N biosynthesis     | 2076.49   | 843.05    | 445.97    | 665.89    | 3717.11   | 1568.21   | 268.00    | 321.09    |
| Pyruvate metabolism                         | M00307 | Pyruvate oxidation                                   | 135156.93 | 201707.03 | 179433.83 | 186414.51 | 143693.26 | 198479.40 | 189168.63 | 202933.44 |
|                                             | M00172 | C4-dicarboxylic acid cycle, NADP -                   | 37435.23  | 58965.07  | 55498.53  | 62513.32  | 38649.34  | 55138.02  | 50850.55  | 55678.12  |

|                                               |        |                                                                            |           |           |           |           |           |           |           |           |
|-----------------------------------------------|--------|----------------------------------------------------------------------------|-----------|-----------|-----------|-----------|-----------|-----------|-----------|-----------|
|                                               | M00579 | malic enzyme type<br>Phosphate acetyltransferase-acetate<br>kinase pathway | 51866.09  | 30402.28  | 33718.24  | 24651.95  | 44088.12  | 37765.24  | 31357.27  | 29596.56  |
| Glyoxylate and<br>dicarboxylate<br>metabolism | M00012 | Glyoxylate cycle                                                           | 73209.65  | 109697.51 | 154449.46 | 118096.21 | 82545.29  | 99066.58  | 143279.25 | 103859.33 |
|                                               | M00373 | Ethylmalonyl pathway                                                       | 103376.19 | 207084.68 | 265153.45 | 225349.28 | 112256.88 | 191454.59 | 244343.36 | 211722.31 |
|                                               | M00740 | Methylaspartate cycle                                                      | 89544.56  | 141280.67 | 161559.36 | 143453.10 | 99123.77  | 121620.90 | 153598.71 | 127597.22 |
|                                               | M00532 | Photorespiration                                                           | 132111.01 | 205540.32 | 215070.23 | 208272.58 | 139232.64 | 198386.49 | 204490.03 | 205648.88 |
|                                               | M00741 | Propanoyl-CoA metabolism                                                   | 52965.76  | 102265.22 | 131786.94 | 116481.89 | 61202.39  | 93359.68  | 123269.60 | 96848.84  |
| Propanoate<br>metabolism                      | M00013 | Malonate semialdehyde pathway                                              | 21015.56  | 20874.58  | 51165.54  | 20846.34  | 22933.75  | 18616.71  | 48126.28  | 22583.44  |
|                                               | M00741 | Propanoyl-CoA metabolism                                                   | 52965.76  | 102265.22 | 131786.94 | 116481.89 | 61202.39  | 93359.68  | 123269.60 | 96848.84  |



**Table S5** The network analysis topology features between different groups.

| Topological indices    | F-A-P1      | S-A-P1      | F-O-P1      | S-O-P1      | F-A-P2      | S-A-P2      | F-O-P2      | S-O-P2      |
|------------------------|-------------|-------------|-------------|-------------|-------------|-------------|-------------|-------------|
| Nodes                  | 69          | 61          | 69          | 65          | 63          | 68          | 66          | 59          |
| Links                  | 58          | 54          | 51          | 50          | 63          | 45          | 60          | 59          |
| Positive               | 36<br>(62%) | 24<br>(44%) | 28<br>(55%) | 22<br>(44%) | 28<br>(44%) | 22<br>(49%) | 29<br>(48%) | 35<br>(59%) |
| Negative               | 22<br>(38%) | 30<br>(56%) | 23<br>(45%) | 28<br>(56%) | 35<br>(56%) | 23<br>(51%) | 31<br>(52%) | 24<br>(41%) |
| Degree                 | 1.681       | 1.770       | 1.478       | 1.538       | 2.000       | 1.324       | 1.818       | 2.000       |
| Diameter               | 3           | 3           | 2           | 3           | 3           | 3           | 3           | 3           |
| Density                | 0.025       | 0.030       | 0.022       | 0.024       | 0.032       | 0.020       | 0.028       | 0.034       |
| Clustering coefficient | 0.787       | 0.865       | 0.806       | 0.806       | 0.857       | 0.682       | 0.863       | 0.952       |
| Modularity             | 0.935       | 0.927       | 1.105       | 0.924       | 0.856       | 0.955       | 0.936       | 0.874       |

**Table S6.** Comparison of COD removal in FWW between HBR and other biological treatment processes.

| Treatment process | Inlet COD concentration (mg/L) | COD load (kg/m <sup>3</sup> ·d) | HRT (h) | Temperature (°C) | Effluent COD concentration (mg/L) | COD Removal rate (%) | Reference            |
|-------------------|--------------------------------|---------------------------------|---------|------------------|-----------------------------------|----------------------|----------------------|
| MBR               | 1500 ~ 2000                    | 3.4                             | 15      | 22 ~ 23          | < 70                              | 96%                  | (Wang et al., 2005)  |
| AnMBR             | 12770                          | 4.52                            | 60      | 37.0 ± 0.5       | 2388                              | 80 ~ 85%             | (He et al., 2005)    |
| AnMBR             | 90200                          | 9.3                             | /       | 39 ± 1           | < 1600                            | > 98%                | (Xiao et al., 2019)  |
| AnDMBR            | 2050 ~ 6880                    | 0.44                            | 120     | 24 ± 2           | 100 ~ 200                         | 94.5                 | (Galib et al., 2016) |
| HBR               | 29860 ± 276                    | 2.67                            | 268.84  | 22 ~ 23          | 900 ~ 1400                        | 96.7 ~ 97.3%         | This study           |
| HBR               | 29860 ± 276                    | 1.68                            | 426.63  | 22 ~ 23          | 194 ~ 458                         | 96.6 ~ 98.2%         | This study           |

MBR: Membrane bioreactor; AMBR: Anaerobic membrane bioreactor; AnDMBR: Anaerobic dynamic membrane bioreactor; HBR: hybrid biofilm reactor.

**Table S7** Contribution of column A and column O to COD removal in stage I.

| Time (d)        | COD volumetric load of O column | Contribution of column A (%) | Contribution of column O (%) | Total COD removal rate (%) |
|-----------------|---------------------------------|------------------------------|------------------------------|----------------------------|
| D <sub>51</sub> | 1.82                            | 29.38                        | 68.19                        | 97.57                      |
| D <sub>52</sub> | 2.06                            | 20.27                        | 77.31                        | 97.59                      |
| D <sub>53</sub> | 2.07                            | 19.19                        | 77.82                        | 97.02                      |
| D <sub>54</sub> | 2.49                            | 3.83                         | 93.30                        | 97.13                      |
| D <sub>55</sub> | 2.32                            | 9.13                         | 86.98                        | 96.10                      |
| D <sub>56</sub> | 2.35                            | 7.61                         | 88.05                        | 95.66                      |
| D <sub>57</sub> | 2.31                            | 7.88                         | 86.72                        | 94.60                      |
| D <sub>58</sub> | 2.57                            | -2.01                        | 96.59                        | 94.58                      |
| D <sub>59</sub> | 2.25                            | 7.21                         | 84.39                        | 91.60                      |
| D <sub>60</sub> | 2.53                            | 1.62                         | 94.78                        | 96.40                      |
| D <sub>61</sub> | 2.10                            | 15.99                        | 78.77                        | 94.76                      |
| D <sub>62</sub> | 2.45                            | 4.91                         | 92.00                        | 96.91                      |
| D <sub>63</sub> | 2.17                            | 14.02                        | 81.30                        | 95.32                      |
| D <sub>64</sub> | 2.21                            | 12.74                        | 82.93                        | 95.66                      |
| D <sub>65</sub> | 2.08                            | 18.83                        | 77.90                        | 96.73                      |
| D <sub>66</sub> | 2.17                            | 14.39                        | 81.48                        | 95.87                      |
| D <sub>67</sub> | 2.18                            | 13.80                        | 81.84                        | 95.64                      |
| D <sub>68</sub> | 2.18                            | 13.67                        | 81.66                        | 95.33                      |
| D <sub>69</sub> | 2.10                            | 17.18                        | 78.93                        | 96.11                      |
| D <sub>70</sub> | 1.96                            | 22.29                        | 73.61                        | 95.89                      |
| D <sub>71</sub> | 1.85                            | 24.87                        | 69.40                        | 94.27                      |
| D <sub>72</sub> | 1.71                            | 30.52                        | 63.98                        | 94.49                      |
| D <sub>73</sub> | 1.97                            | 20.79                        | 73.97                        | 94.76                      |
| D <sub>74</sub> | 1.88                            | 24.54                        | 70.68                        | 95.23                      |
| D <sub>75</sub> | 1.93                            | 25.58                        | 72.33                        | 97.91                      |
| <b>Mean</b>     | <b>2.15</b>                     | <b>15.13</b>                 | <b>80.60</b>                 | <b>95.73</b>               |



**Table S8** Performance of UASB process in degrading organic wastewater.

| Wastewater types              | Inlet COD concentration (mg/L) | Inlet COD load (kg/m <sup>3</sup> ·d) | Temperature (°C) | Reactor volume (m <sup>3</sup> ) | COD Removal rate (%) |
|-------------------------------|--------------------------------|---------------------------------------|------------------|----------------------------------|----------------------|
| Alcohol wastewater            | 34060                          | 13.6                                  | 32               | 130                              | 81                   |
| Brewing wastewater            | 2000 ~ 6000                    | 4.2                                   | Ambient          | 64.8                             | 82.4                 |
| Slaughterhouse wastewater     | 1000                           | 2.5                                   | Ambient          | 250                              | 77                   |
| Acetone butanol wastewater    | 15000                          | 2.5                                   | 35               | 3000*2                           | 80                   |
| Fermented drug mixture        | 23450                          | 11.8                                  | 35               | 200*4                            | 91                   |
| Sugar fermentation wastewater | 20000                          | 4                                     | 35               | -                                | 85                   |
| Citric acid wastewater        | 10000                          | 10                                    | 35               | 380                              | 80                   |

Data sourced from: Hu JC, Zhou MJ, Zuo JE, Zhou Qi, He M. Theory and technology of anaerobic biological treatment of wastewater[M], China Architecture Publishing & Media Co., Ltd. 2003: 1-303. (In Chinese)

**Table S9** Permissible organic volume loading rate of different wastewater at different temperatures.

| Temperature<br>(°C) | Organic volume loading rate (kg COD /m <sup>3</sup> ·d) |                        |                                                 |
|---------------------|---------------------------------------------------------|------------------------|-------------------------------------------------|
|                     | VFA containing<br>wastewater                            | VFA free<br>wastewater | Wastewater with SS accounting<br>for 30% of COD |
| 15                  | 2 ~ 4                                                   | 1.5 ~ 3                | 1.5 ~ 2                                         |
| 20                  | 4 ~ 6                                                   | 2 ~ 4                  | 2 ~ 3                                           |
| 25                  | 6 ~ 12                                                  | 4 ~ 8                  | 3 ~ 6                                           |
| 30                  | 10 ~ 18                                                 | 8 ~ 12                 | 6 ~ 9                                           |
| 35                  | 15 ~ 24                                                 | 12 ~ 18                | 9 ~ 14                                          |
| 40                  | 20 ~ 32                                                 | 15 ~ 24                | 14 ~ 18                                         |

Data sourced from: Hu JC, Zhou MJ, Zuo JE, Zhou Qi, He M. Theory and technology of anaerobic biological treatment of wastewater[M], China Architecture Publishing & Media Co., Ltd. 2003: 1-303. (In Chinese) (VFA: volatile fatty acids, SS: suspended solid)

## References

- Galib, M., Elbeshbishy, E., Reid, R., et al. 2016. Energy-positive food wastewater treatment using an anaerobic membrane bioreactor (AnMBR). *Journal of Environmental Management*. 182, 477-485. <https://doi.org/10.1016/j.jenvman.2016.07.098>
- He, Y., Xu, P., Li, C., et al. 2005. High-concentration food wastewater treatment by an anaerobic membrane bioreactor. *Water Research*. 39 (17), 4110-4118. <https://doi.org/10.1016/j.watres.2005.07.030>
- Wang, Y., Huang, X., Yuan, Q. 2005. Nitrogen and carbon removals from food processing wastewater by an anoxic/aerobic membrane bioreactor. *Process Biochemistry*. 40 (5), 1733-1739. <https://doi.org/10.1016/j.procbio.2004.06.039>
- Xiao, X., Shi, W., Ruan, W. 2019. Performance and Microbial Community Structure of Anaerobic Membrane Bioreactor for Lipids-Rich Kitchen Waste Slurry Treatment: Mesophilic and Thermophilic Processes. *Processes*. 7 (12), 879. <https://doi.org/10.3390/pr7120879>
